# Supplementary material for: miR-155 acts as an anti-inflammatory factor in atherosclerosis-associated foam cell formation by repressing calcium-regulated heat stable protein 1
Source: PubMed Central journal article supplement (PMC4761895; doi:10.1038/srep21789), 2016-02-22

Supplementary materials

**miR-155 acts as an anti-inflammatory factor in atherosclerosis-associated foam cell formation by repressing calcium-regulated heat stable protein 1**

Xiaoyi Li<sup>a,bl</sup>, Deyong Kong<sup>al</sup>, Heming Chen<sup>cl</sup>, Shuiyi Liu<sup>a,d</sup>, Hui Hu<sup>a</sup>, Tangwei Wu<sup>a</sup>, Jing Wang<sup>a</sup>,  
Weiqun Chen<sup>a,d,e</sup>, Yong Ning<sup>b</sup>, Yong Li<sup>a,f\*</sup>, Zhongxin Lu<sup>a,b,d\*</sup>

<sup>a</sup> Department of Medical Laboratory, Central Hospital of Wuhan, Wuhan 430014, China

<sup>b</sup> School of Laboratory Medicine, Hubei University of Chinese Medicine, Wuhan 430065, China

<sup>c</sup> Department of Cardiovascular and Thoracic Surgery, Second Xiangya Hospital, Central South University, Changsha 410011, China

<sup>d</sup> Cancer Research Institute of Wuhan, Wuhan 430014, China

<sup>e</sup> Department of Central Laboratory, Central Hospital of Wuhan, Wuhan 430014, China

<sup>f</sup> Department of Cancer Biology, Lerner Research Institute, Cleveland Clinic, Cleveland, OH 44195, USA

Supplementary Figure S1: Full-length blots for Figure 3D

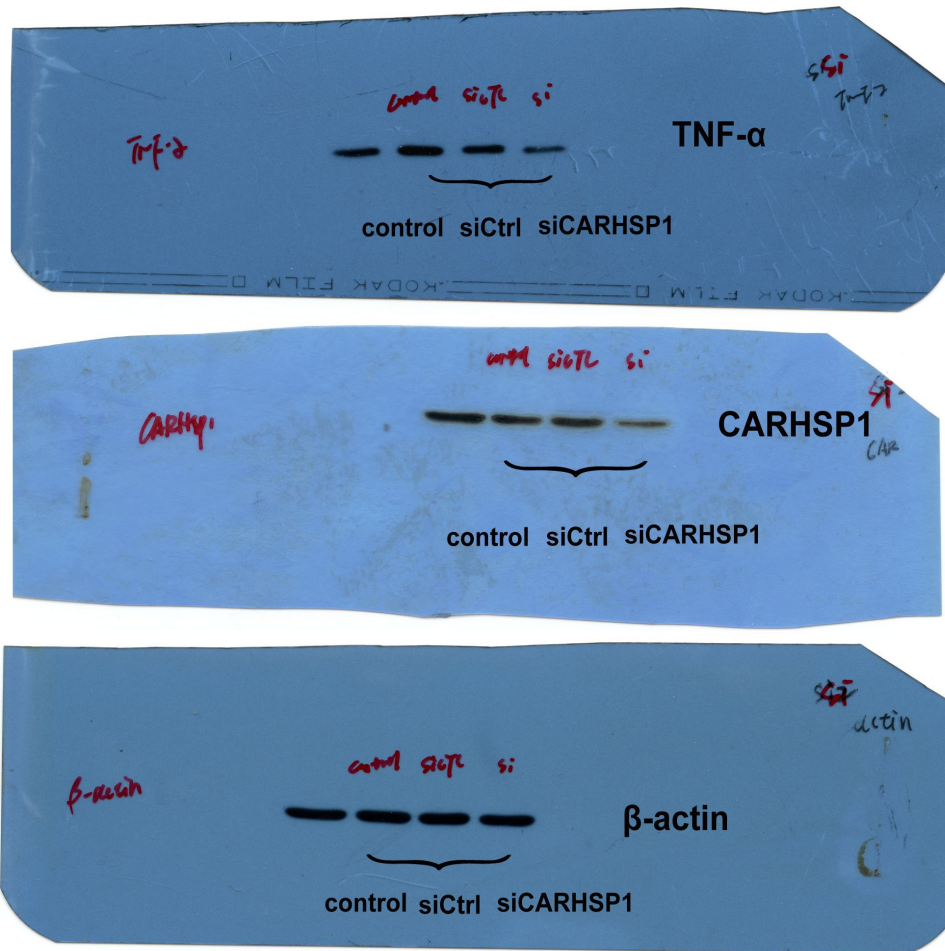

Supplementary Figure S2: Full-length blots for Figure 3H

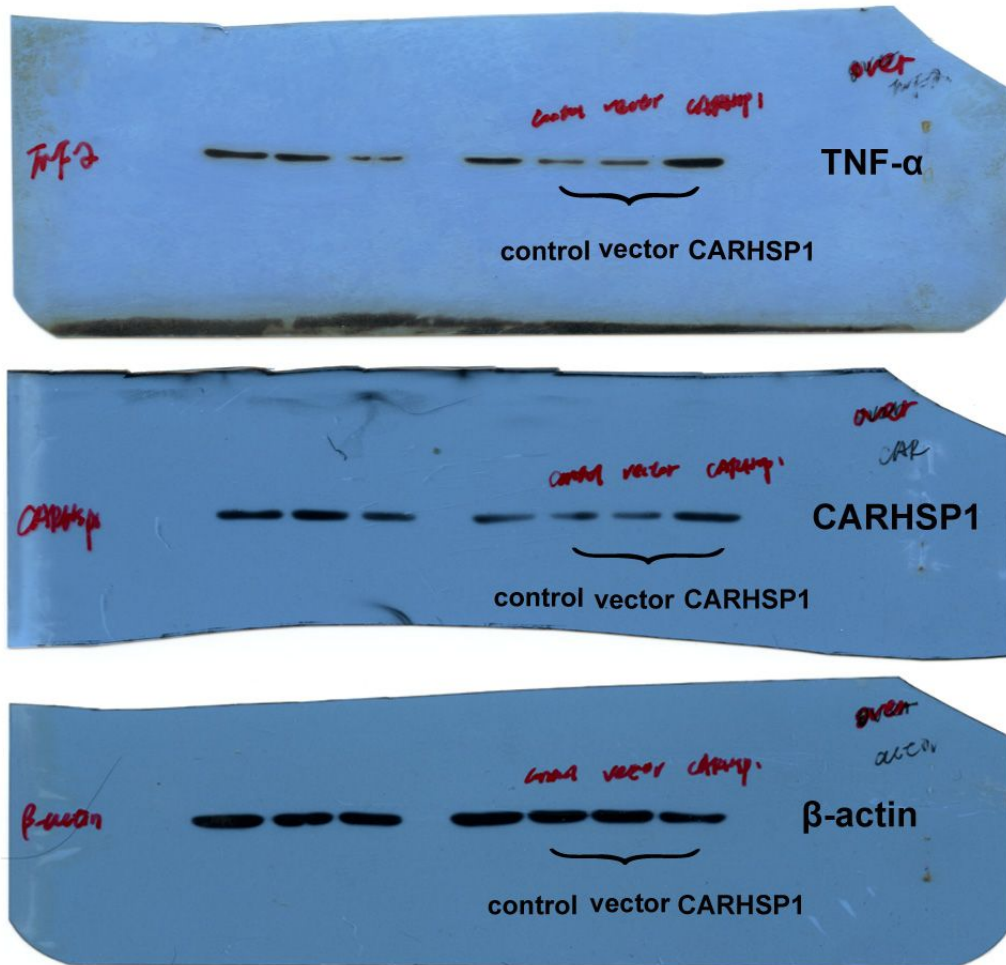

**Supplementary Figure S3:** The conservation of the binding site of miR-155 in CARHSP1

|                |                                        |
|----------------|----------------------------------------|
| <b>miR-155</b> | <b>UUA<u>AUGC</u>UAAUCGUGAUAGGGGU</b>  |
| <b>Hsa</b>     | <b>GAAGAGCAU<u>UAAA</u>AGCAUUUAAAA</b> |
| <b>Mmu</b>     | <b>GAAAAGCAU<u>UAAA</u>AGCAUUUGAAA</b> |
| <b>Rno</b>     | <b>GAAAAGCAU<u>UAAA</u>AGCAUUUGAAA</b> |
| <b>Ocn</b>     | <b>GAAAAGCAU<u>UAAA</u>AGCAUUGAAAA</b> |
| <b>Eca</b>     | <b>GAAAAGCAU<u>UAAA</u>AGCAUUGCAA</b>  |

Figure S3. The nucleotides complementary to the miR-155 seed sequences are highly conserved in human, mouse, rat, rabbit and horse. The miR-155 seed sequences are in red and the complementary nucleotides in the 3'UTR of CARHSP1 are gray shade.

**Supplementary Figure S4:** Full-length blots for Figure 4D

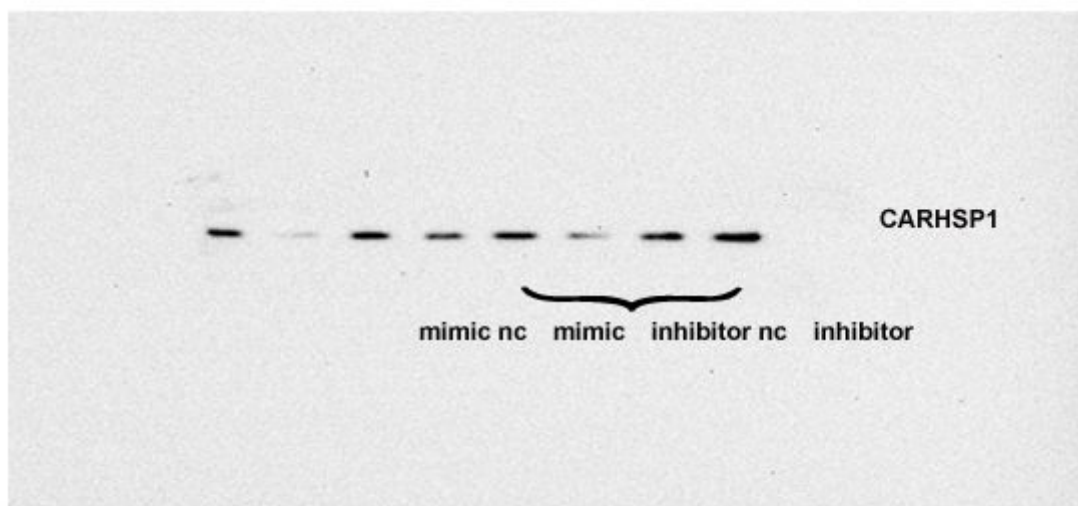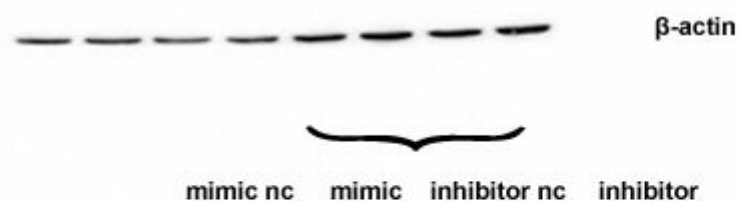

Supplementary Figure S5: Full-length blots for Figure 4H

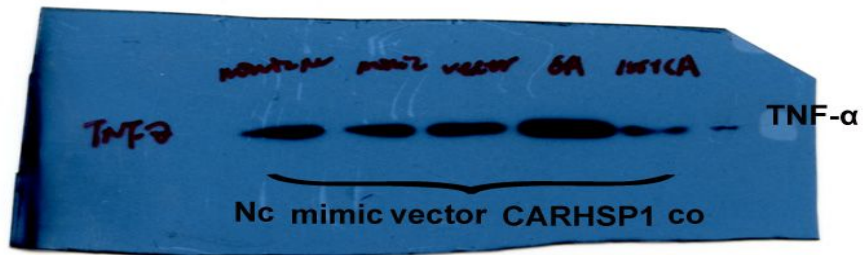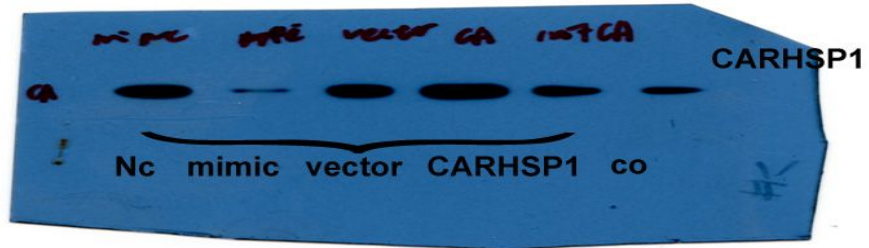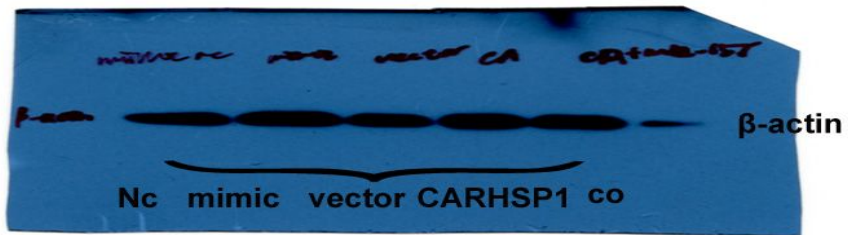

Supplementary Figure S6: Full-length blots for Figure 5B

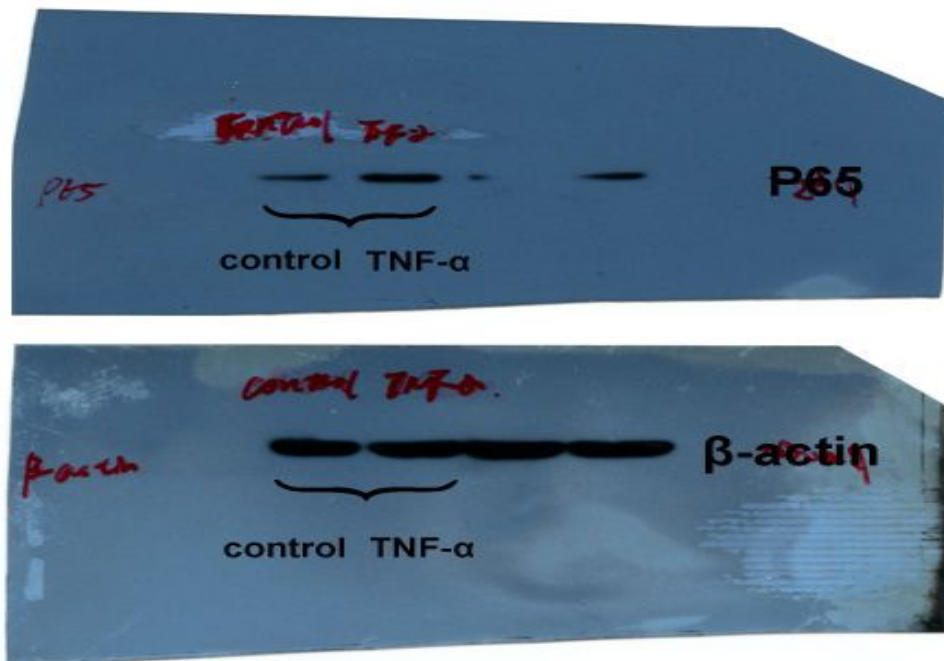

Supplementary Figure S7: Full-length gels for Figure 5C

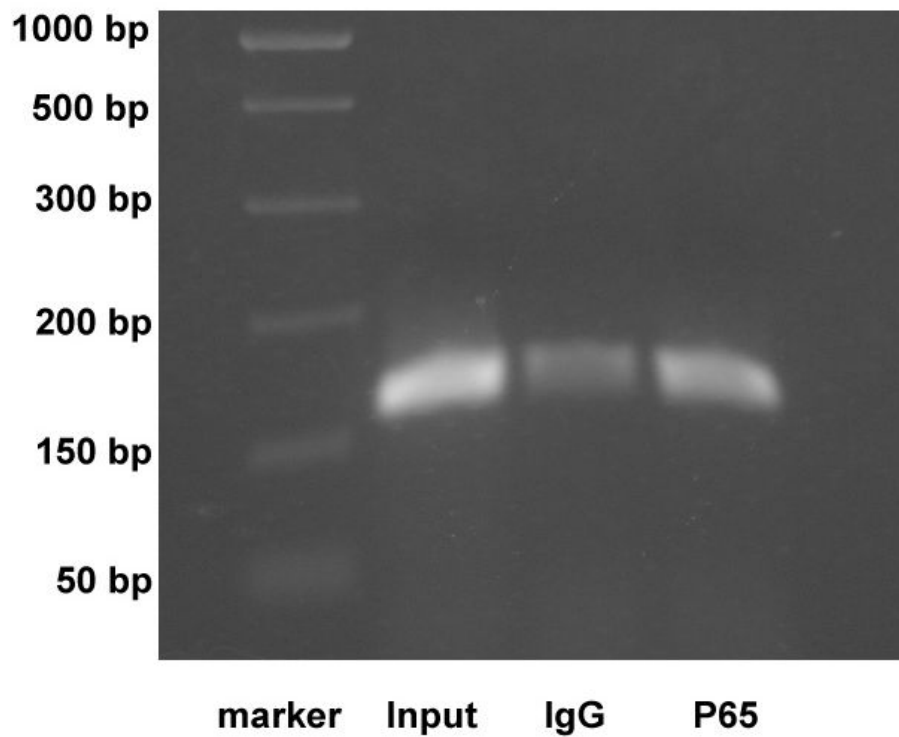

Supplement: srep21789-s1.pdf [file srep21789-s1.pdf]
